# Supplementary material for: 3D hierarchical porous NiO nanoflowers as an advanced anode material with remarkable lithium storage performance
Source: Royal Society of Chemistry journal article supplement (doi:10.1039/c5ra27715a), 2016-01-01
Supplement: c5ra27715a1.pdf [file c5ra27715a1.pdf]

## Electronic Supplementary Information

### 3D Hierarchical Porous NiO Nanoflowers as an Advanced Anode Material with Remarkable Lithium Storage Performance

Yingping Pang,<sup>a</sup> Jian Zhang,<sup>a</sup> Dairong Chen,<sup>\*a,b</sup> and Xiuling Jiao<sup>\*a,b</sup>

<sup>a</sup>School of Chemistry and Chemical Engineering, Shandong University, Jinan 250100, P. R. China

<sup>b</sup>National Engineering Research Center for Colloidal Materials, Shandong University, Jinan 250100, P. R. China

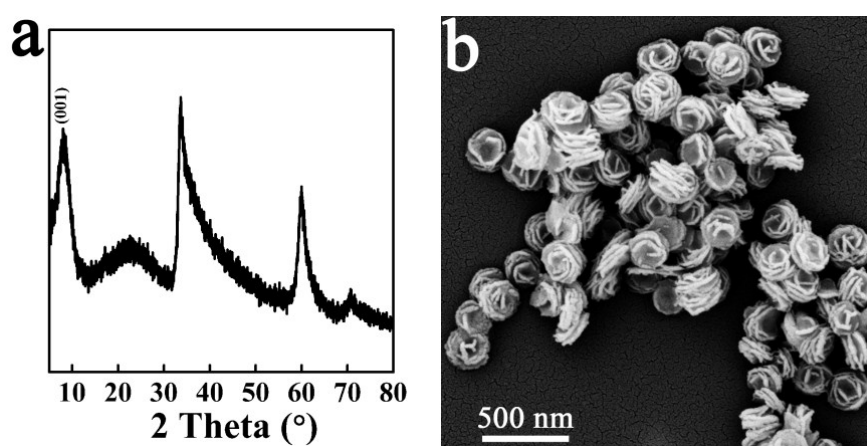

Fig. S1 XRD pattern and SEM images of nickel-precursor<sup>1</sup>.

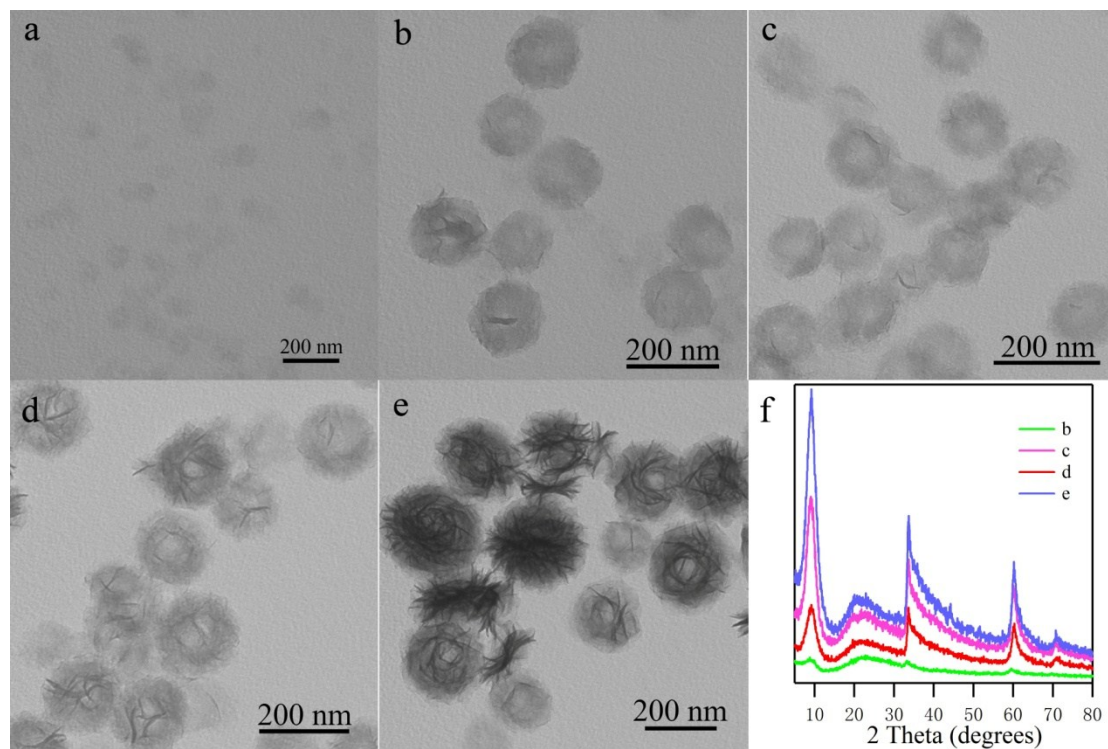

Fig. S2 TEM (a–e) images and XRD pattern (f) of the samples obtained for different solvothermal reaction times. (a) 50 min, (b) 60 min, (c) 180 min, (d) 240 min, (e) 300 min.

## Electronic Supplementary Information

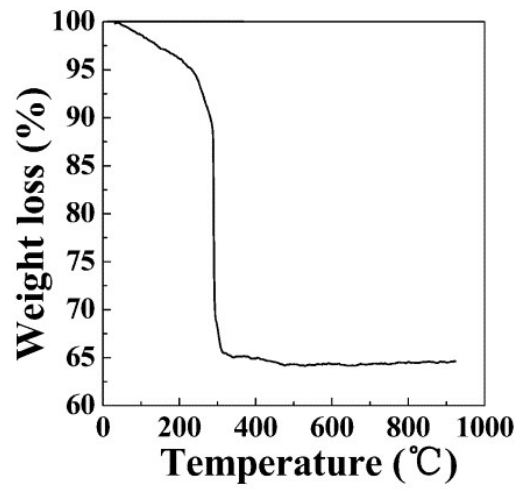

Fig. S3 TG-DSC curves of the as-prepared precursors.

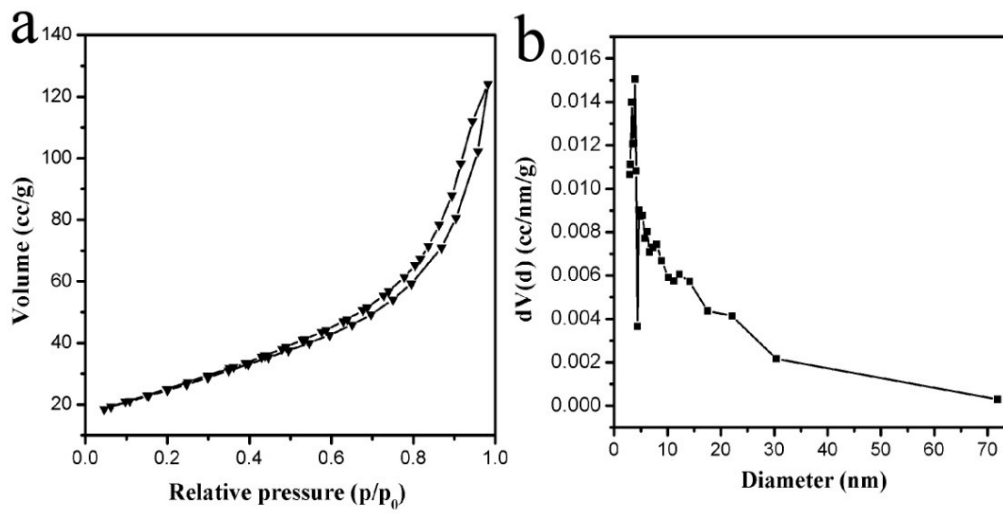

Fig. S4 (a) N<sub>2</sub> adsorption-desorption isotherm, and (b) pore-size distribution of the as-prepared NiO nanoflowers.

## Electronic Supplementary Information

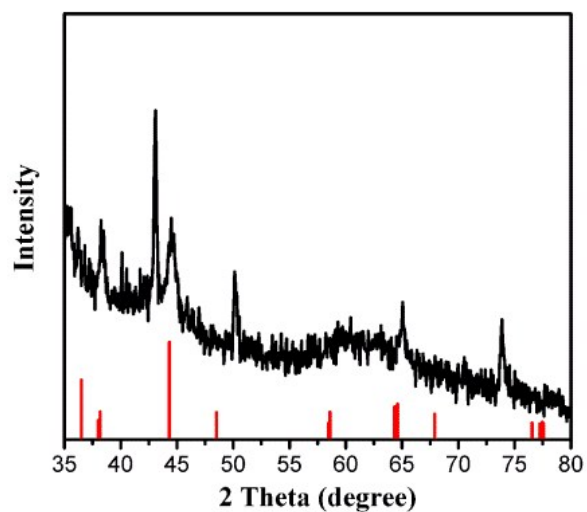

**Fig. S5** XRD pattern of the product after being discharged/charged over 50 cycles at a current density of  $100 \text{ mA g}^{-1}$ .

### References

1. Xu, L. Ding, Y. S. Chen, C. H. Zhao, L. C. Rinkus, R. Joesten and S. L. Suib, *Chem. Mater.* 2007, **20**, 308–316.
